# Supplementary material for: Plasmalogen enrichment in exosomes secreted by a nematode parasite versus those derived from its mouse host: implications for exosome stability and biology
Source: PubMed Central journal article supplement — J Extracell Vesicles. 2016 Jul 5;5:10.3402/jev.v5.30741. doi: 10.3402/jev.v5.30741 (PMC4937767; doi:10.3402/jev.v5.30741), 2016-07-05
Supplement: JEV-5-30741-s001.pdf [file JEV-5-30741-s001.pdf]

# Supplementary Figure 1

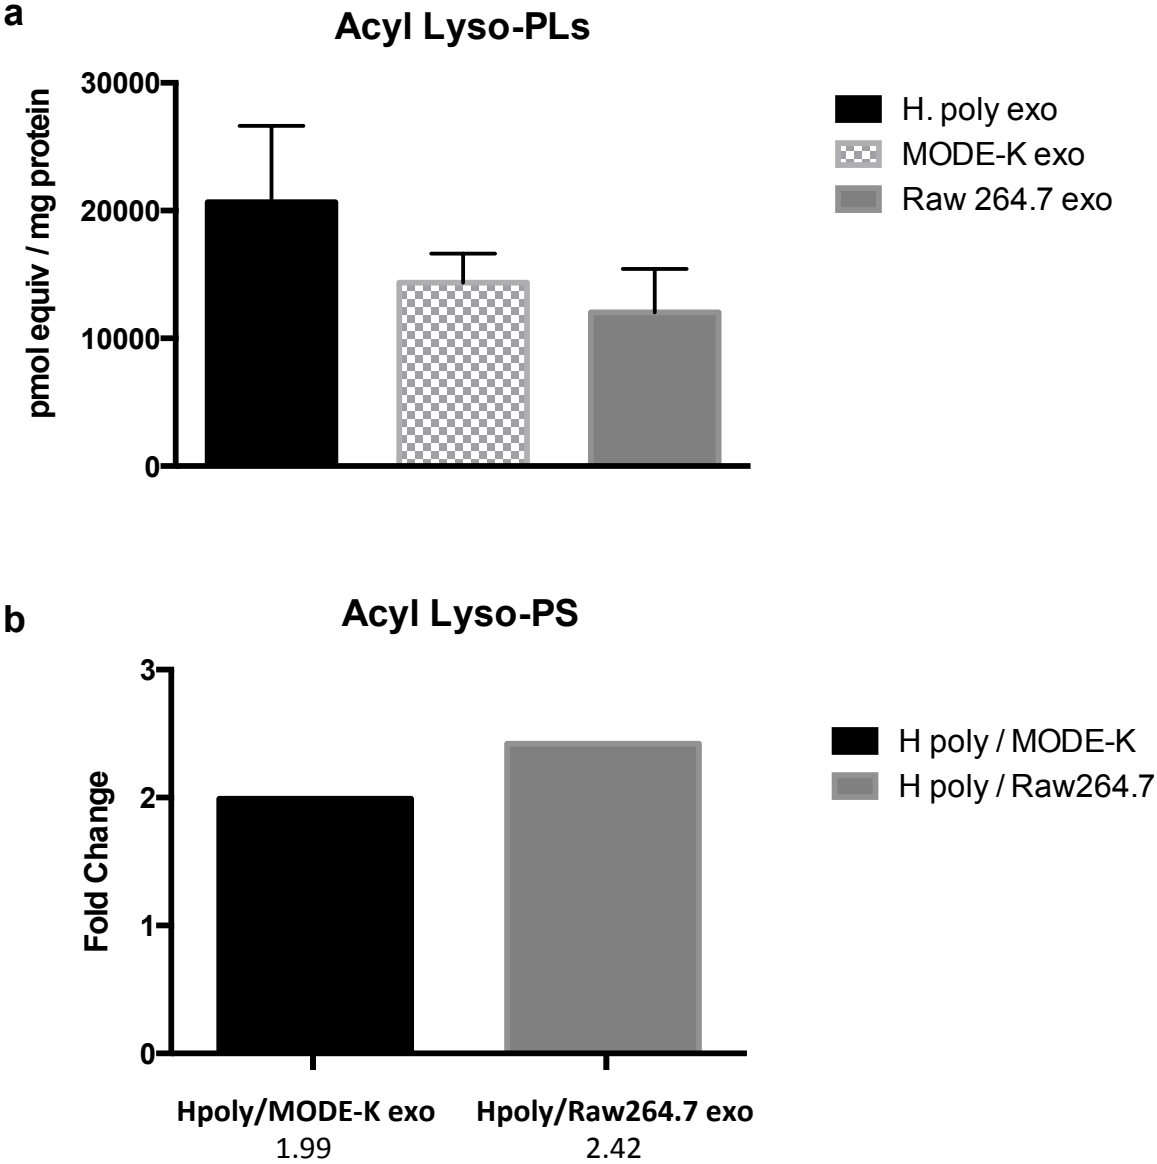

**Supplementary Table 1:** Elemental composition of glycerophospholipid and sphingolipid species found in exosomes, calculated by mass accuracy within error of 5 ppm, with atom constraints and with  $-0.5 \leq \text{DBE} \leq 15.0$ . DBE: double-bond equivalent. Elemental composition refers to the  $[\text{M}+\text{H}]^+$  ions for PC, ether-PC, lyso-PC, lyso-ether-PC and sphingolipids and  $[\text{M}-\text{H}]^-$  ions for PE, ether-PE, lyso-PE, lyso-ether-PE, PS and lyso-PS.

| <b>GLYCEROPHOSPHOLIPIDS</b> |                     |                           |                              |                             |                    |            |                 |
|-----------------------------|---------------------|---------------------------|------------------------------|-----------------------------|--------------------|------------|-----------------|
| <b>Lipid subclass</b>       | <b>Lipid specie</b> | <b>Measured mass (Da)</b> | <b>Elemental composition</b> | <b>Calculated mass (Da)</b> | <b>Error (ppm)</b> | <b>DBE</b> | <b>RT (min)</b> |
| <b>PC</b>                   |                     |                           |                              |                             |                    |            |                 |
|                             | 32:0                | 734.5711                  | C40H81NO8P                   | 734.5700                    | 1.1                | 1.5        | 8.3             |
|                             | 32:1                | 732.5576                  | C40H79NO8P                   | 732.5543                    | 4.5                | 2.5        | 7.4             |
|                             | 32:2                | 730.5383                  | C40H77NO8P                   | 730.5387                    | -0.5               | 3.5        | 6.4             |
|                             | 34:0                | 762.6019                  | C42H85NO8P                   | 762.6007                    | 0.8                | 1.5        | 9.7             |
|                             | 34:1                | 760.5882                  | C42H83NO8P                   | 760.5856                    | 3.4                | 2.5        | 8.7             |
|                             | 34:2                | 758.5698                  | C42H81NO8P                   | 758.5700                    | -0.3               | 3.5        | 7.8             |
|                             | 34:3                | 756.5546                  | C42H79NO8P                   | 756.5543                    | 0.4                | 4.5        | 6.9             |
|                             | 36:1                | 788.6193                  | C44H87NO8P                   | 788.6169                    | 3.0                | 2.5        | 10.1            |
|                             | 36:2                | 786.6008                  | C44H85NO8P                   | 786.6013                    | -0.6               | 3.5        | 9.2             |
|                             | 36:3                | 784.5871                  | C44H83NO8P                   | 784.5856                    | 1.95               | 4.5        | 8.3             |
|                             | 36:4                | 782.5703                  | C44H81NO8P                   | 782.5700                    | 1.2                | 5.5        | 7.9             |
|                             | 36:4                | 782.5709                  | C44H81NO8P                   | 782.5700                    | 1.1                | 5.5        | 7.4             |
|                             | 36:5                | 780.5547                  | C44H79NO8P                   | 780.5543                    | 0.5                | 6.5        | 7.0             |
|                             | 36:6                | 778.5378                  | C44H77NO8P                   | 778.5387                    | -1.2               | 7.5        | 6.5             |
|                             | 38:0                | 818.6619                  | C46H93NO8P                   | 818.6639                    | -2.5               | 1.5        | 11.5            |
|                             | 38:2                | 814.6308                  | C46H89NO8P                   | 814.6326                    | -2.2               | 3.5        | 10.3            |
|                             | 38:3                | 812.6161                  | C46H87NO8P                   | 812.6169                    | -1.0               | 4.5        | 9.7             |
|                             | 38:4                | 810.6013                  | C46H85NO8P                   | 810.6013                    | 0.0                | 5.5        | 9.3             |
|                             | 38:4                | 810.6019                  | C46H85NO8P                   | 810.6013                    | 0.7                | 5.5        | 8.9             |
|                             | 38:5                | 808.5846                  | C46H83NO8P                   | 808.5856                    | -1.2               | 6.5        | 8.1             |
|                             | 38:6                | 806.5701                  | C46H81NO8P                   | 806.5700                    | 0.1                | 7.5        | 7.7             |
|                             | 40:2                | 842.6608                  | C48H93NO8P                   | 842.6639                    | -3.9               | 3.5        | 11.4            |
|                             | 40:5                | 836.6185                  | C48H87NO8P                   | 836.6169                    | 1.9                | 6.5        | 9.5             |
|                             | 40:6                | 834.5995                  | C48H85NO8P                   | 834.6013                    | -2.2               | 7.5        | 9.1             |

|                 |          |             |          |      |     |      |
|-----------------|----------|-------------|----------|------|-----|------|
| 40:6            | 834.6034 | C48H85NO8P  | 834.6013 | 2.5  | 7.5 | 8.5  |
| 40:7            | 832.5835 | C48H83NO8P  | 832.5825 | 2.3  | 5.3 | 8.0  |
| 42:2            | 870.6949 | C50H97NO8P  | 870.6952 | -0.3 | 3.5 | 12.5 |
| 44:1            | 900.7413 | C52H103NO8P | 900.7421 | -0.9 | 2.5 | 14.4 |
| 44:2            | 898.7245 | C52H103NO8P | 898.7265 | -2.2 | 3.5 | 13.5 |
| 44:3            | 896.7138 | C52H99NO8P  | 896.7108 | 3.3  | 4.5 | 12.7 |
| <b>Ether-PC</b> |          |             |          |      |     |      |
| 30:1            | 690.5452 | C38H77NO7P  | 690.5438 | 2.0  | 1.5 | 9.8  |
| 30:2            | 688.5291 | C38H75NO7P  | 688.5281 | 1.5  | 2.5 | 8.8  |
| 32:1            | 718.5754 | C40H81NO7P  | 718.5751 | 0.4  | 1.5 | 11.0 |
| 32:2            | 716.5579 | C40H79NO7P  | 716.5594 | -1.5 | 2.5 | 10.2 |
| 34:0            | 748.6240 | C42H87NO7P  | 748.6220 | 2.7  | 0.5 | 10.9 |
| 34:1            | 746.6050 | C42H85NO7P  | 746.6058 | -1.1 | 1.5 | 10.0 |
| 34:2            | 744.5919 | C42H83NO7P  | 744.5902 | 2.3  | 2.5 | 9.6  |
| 34:3            | 742.5738 | C42H81NO7P  | 742.5745 | -0.9 | 3.5 | 8.7  |
| 36:0            | 776.6532 | C44H91NO7P  | 776.6528 | 0.5  | 0.5 | 11.8 |
| 36:2            | 772.6204 | C44H87NO7P  | 772.6220 | -2.1 | 2.5 | 10.9 |
| 36:3            | 770.6076 | C44H85NO7P  | 770.6064 | 1.6  | 3.5 | 9.9  |
| 36:4            | 768.5942 | C44H83NO7P  | 768.5907 | 4.6  | 4.5 | 8.8  |
| 36:5            | 766.5746 | C44H81NO7P  | 766.5751 | -0.7 | 5.5 | 7.9  |
| 38:0            | 804.6840 | C46H95NO7P  | 804.6846 | -0.7 | 0.5 | 12.9 |
| 38:1            | 802.6621 | C46H93NO7P  | 802.6690 | 3.9  | 1.5 | 12.0 |
| 38:2            | 800.6517 | C46H91NO7P  | 800.6533 | .2.0 | 2.5 | 11.0 |
| 38:3            | 798.6375 | C46H89NO7P  | 798.6377 | -0.3 | 3.5 | 10.1 |
| 40:2            | 828.6858 | C48H95NO7P  | 828.6846 | 1.4  | 2.5 | 12.2 |
| 40:3            | 826.6690 | C48H93NO7P  | 826.6695 | 0.6  | 3.5 | 11.5 |
| 40:4            | 824.6522 | C48H91NO7P  | 824.6533 | -1.3 | 4.5 | 10.8 |
| <b>Lyso PC</b>  |          |             |          |      |     |      |
| 16:0            | 496.3391 | C24H51NO7P  | 496.3403 | -2.4 | 0.5 | 2.6  |
| 16:1            | 494.3241 | C24H49NO7P  | 494.3247 | -1.2 | 1.5 | 2.1  |
| 18:0            | 524.3708 | C26H55NO7P  | 524.3716 | -1.5 | 0.5 | 3.2  |
| 18:1            | 522.3550 | C26H53NO7P  | 522.3560 | -1.9 | 1.5 | 2.7  |
| 18:2            | 520.3415 | C26H51NO7P  | 520.3403 | 2.3  | 2.5 | 2.4  |

|                      |          |             |          |      |      |      |
|----------------------|----------|-------------|----------|------|------|------|
| 20:0                 | 552.4020 | C28H59NO7P  | 552.4029 | -1.6 | 0.5  | 3.5  |
| 20:1                 | 550.3860 | C28H57NO7P  | 550.3873 | -2.4 | 1.5  | 3.3  |
| 20:3                 | 546.3577 | C28H53NO7P  | 546.3560 | 3.1  | 3.5  | 3.0  |
| 20:4                 | 544.3405 | C28H51NO7P  | 544.3403 | 0.4  | 4.5  | 2.6  |
| 20:5                 | 542.3246 | C28H49NO7P  | 542.3244 | 3.4  | 2.5  | 2.2  |
| 22:0                 | 580.4321 | C30H63NO7P  | 580.4342 | -3.6 | 0.5  | 4.5  |
| 22:1                 | 578.4186 | C30H61NO7P  | 580.4342 | -2.9 | 0.5  | 3.9  |
| <b>Ether-Lyso PC</b> |          |             |          |      |      |      |
| 16:0                 | 482.3597 | C24H53NO6P  | 482.3605 | -1.7 | -0.5 | 2.8  |
| 18:0                 | 510.3912 | C26H57NO6P  | 510.3924 | -1.2 | -0.5 | 3.9  |
| 18:1                 | 508.3750 | C26H55NO6P  | 508.3767 | -2.2 | 0.5  | 3.5  |
| 20:1                 | 536.4061 | C28H59NO6P  | 536.4080 | -3.5 | 0.5  | 4.2  |
| <b>PE</b>            |          |             |          |      |      |      |
| 32:0                 | 690.5096 | C37H73NO8P  | 690.5074 | 3.2  | 2.5  | 8.3  |
| 32:1                 | 688.4922 | C37H71NO8P  | 688.4917 | 0.7  | 3.5  | 7.3  |
| 32:2                 | 686.4761 | C37H769NO8P | 686.4761 | 0.0  | 4.5  | 6.5  |
| 34:0                 | 718.5399 | C39H77NO8P  | 718.5387 | 1.7  | 2.5  | 9.5  |
| 34:1                 | 716.5247 | C39H75NO8P  | 716.5230 | 2.4  | 3.5  | 8.8  |
| 34:2                 | 714.5079 | C39H73NO8P  | 714.5074 | 0.5  | 4.5  | 7.8  |
| 34:3                 | 712.4923 | C39H71NO8P  | 712.4917 | 0.8  | 5.5  | 6.8  |
| 36:0                 | 746.5720 | C41H81NO8P  | 746.5700 | 3.0  | 2.5  | 11.0 |
| 36:1                 | 744.5532 | C41H79NO8P  | 744.5543 | -1.5 | 3.5  | 10.1 |
| 36:2                 | 742.5387 | C41H77NO8P  | 742.5375 | -1.6 | 4.5  | 9.2  |
| 36:3                 | 740.5239 | C41H75NO8P  | 740.5230 | 1.2  | 5.5  | 8.2  |
| 36:4                 | 738.5082 | C41H73NO8P  | 738.5074 | 1.1  | 6.5  | 7.3  |
| 36:5                 | 736.4939 | C41H71NO8P  | 736.4917 | 3.0  | 7.5  | 6.8  |
| 38:1                 | 772.5841 | C43H83NO8P  | 772.5856 | -1.9 | 3.5  | 11.2 |
| 38:2                 | 770.5727 | C43H81NO8P  | 770.5700 | 3.5  | 4.5  | 10.4 |
| 38:3                 | 768.5536 | C43H79NO8P  | 768.5543 | -0.9 | 5.5  | 9.7  |
| 38:4                 | 766.5363 | C43H77NO8P  | 766.5387 | -3.1 | 6.5  | 8.8  |
| 38:5                 | 764.5255 | C43H75NO8P  | 764.5230 | 3.3  | 7.5  | 7.6  |
| 38:6                 | 762.5042 | C43H73NO8P  | 762.5074 | -4.3 | 8.5  | 6.8  |
| 40:0                 | 802.6325 | C45H89NO8P  | 802.6315 | 4.5  | 3.2  | 12.9 |

|                 |          |            |          |      |     |      |
|-----------------|----------|------------|----------|------|-----|------|
| 40:1            | 800.6192 | C45H87NO8P | 800.6169 | -2.9 | 3.5 | 12.5 |
| 40:2            | 798.6047 | C45H85NO8P | 798.6013 | 4.3  | 4.5 | 11.6 |
| 40:3            | 796.5862 | C45H83NO8P | 796.5856 | 0.7  | 5.5 | 10.9 |
| 40:4            | 794.5707 | C45H81NO8P | 794.5700 | 0.91 | 6.5 | 10.2 |
| 40:5            | 792.5571 | C45H79NO8P | 792.5543 | 3.5  | 7.5 | 9.4  |
| <b>Ether-PE</b> |          |            |          |      |     |      |
| 32:1            | 674.5128 | C37H73NO7P | 674.5125 | 0.4  | 2.5 | 9.3  |
| 32:2            | 672.4978 | C37H71NO7P | 672.4968 | 1.5  | 3.5 | 8.3  |
| 32:3            | 670.4831 | C37H69NO7P | 670.4811 | 3.0  | 4.5 | 7.3  |
| 34:0            | 704.5580 | C39H79NO7P | 704.5594 | -2.0 | 1.5 | 11.7 |
| 34:1            | 702.5446 | C39H77NO7P | 702.5438 | 1.1  | 2.5 | 10.5 |
| 34:2            | 700.5292 | C39H75NO7P | 700.5281 | 1.6  | 3.5 | 9.6  |
| 34:3            | 698.5138 | C39H73NO7P | 698.5125 | 1.9  | 4.5 | 8.7  |
| 34:4            | 696.4969 | C39H71NO7P | 696.4968 | 0.1  | 5.5 | 7.8  |
| 36:1            | 730.5792 | C41H81NO7P | 730.5771 | 2.9  | 2.5 | 11.7 |
| 36:2            | 728.5594 | C41H79NO7P | 728.5594 | 0.0  | 3.5 | 10.9 |
| 36:3            | 726.5454 | C41H77NO7P | 726.5438 | 2.2  | 4.5 | 10.1 |
| 36:4            | 724.5303 | C41H75NO7P | 724.5281 | 3.0  | 5.5 | 9.2  |
| 36:5            | 722.5127 | C41H73NO7P | 722.5125 | 0.3  | 6.5 | 8.8  |
| 36:6            | 720.4961 | C41H71NO7P | 720.4968 | -1.0 | 7.5 | 8.0  |
| 38:2            | 756.5885 | C43H83NO7P | 756.5907 | -2.9 | 3.5 | 12.0 |
| 38:3            | 754.5734 | C43H81NO7P | 754.5751 | -2.3 | 4.5 | 11.2 |
| 38:4            | 752.5618 | C43H79NO7P | 752.5594 | 3.2  | 5.5 | 10.5 |
| 38:5            | 750.5460 | C43H77NO7P | 750.5438 | 2.9  | 6.5 | 10.0 |
| 38:6            | 748.5278 | C43H75NO7P | 748.5281 | -0.4 | 7.5 | 9.1  |
| 38:7            | 746.5127 | C43H73NO7P | 746.5125 | 0.3  | 8.5 | 8.3  |
| 40:2            | 784.6244 | C44H87NO7P | 784.6220 | 3.1  | 3.5 | 13.0 |
| 40:3            | 782.6052 | C44H85NO7P | 782.6064 | -1.5 | 4.5 | 12.1 |
| 40:4            | 780.5939 | C44H83NO7P | 780.5907 | 4.1  | 5.5 | 11.6 |
| 40:5            | 778.5743 | C44H81NO7P | 778.5751 | -1.0 | 6.5 | 10.9 |
| 40:6            | 776.5602 | C44H79NO7P | 776.5594 | 1.0  | 7.5 | 10.4 |
| 40:7            | 774.5444 | C44H77NO7P | 774.5438 | 0.8  | 8.5 | 9.3  |
| <b>LysoPE</b>   |          |            |          |      |     |      |

|                    |          |             |          |      |     |     |
|--------------------|----------|-------------|----------|------|-----|-----|
| 16:0               | 452.2778 | C21H43NO7P  | 452.2777 | 0.2  | 1.5 | 2.6 |
| 16:1               | 450.2613 | C21H41NO7P  | 450.2621 | -1.8 | 2.5 | 2.1 |
| 18:0               | 480.3091 | C23H47NO7P  | 480.3090 | 0.2  | 1.5 | 3.2 |
| 18:1               | 478.2926 | C23H45NO7P  | 478.2934 | -1.7 | 2.5 | 2.6 |
| 18:2               | 476.2745 | C23H43NO7P  | 476.2718 | 1.5  | 3.5 | 2.1 |
| 20:0               | 508.3407 | C25H51NO7P  | 508.3403 | 0.8  | 1.5 | 3.8 |
| 20:1               | 506.3226 | C25H49NO7P  | 506.3247 | -4.1 | 2.5 | 3.2 |
| 20:2               | 504.3080 | C25H47NO7P  | 504.3090 | -2.0 | 3.5 | 2.9 |
| 20:3               | 502.2915 | C25H45NO7P  | 502.2934 | -3.8 | 4.5 | 2.6 |
| 20:4               | 500.2792 | C25H43NO7P  | 500.2777 | 3.0  | 5.5 | 2.3 |
| 22:2               | 532.3418 | C27H51NO7P  | 532.3403 | 2.8  | 3.5 | 3.4 |
| 22:3               | 530.3258 | C27H49NO7P  | 530.3247 | 2.1  | 4.5 | 3.2 |
| 22:4               | 528.3110 | C27H47NO7P  | 528.3090 | 3.8  | 5.5 | 2.8 |
| 22:5               | 526.2937 | C27H45NO7P  | 526.2935 | 0.6  | 6.5 | 2.5 |
| 22:6               | 524.2772 | C27H43NO7P  | 524.2777 | -1.0 | 7.5 | 2.3 |
| <b>EtherLysoPE</b> |          |             |          |      |     |     |
| 16:1               | 436.2817 | C21H43NO6P  | 436.2828 | -2.5 | 1.5 | 2.8 |
| 18:1               | 464.3123 | C23H47NO6P  | 464.3141 | -3.9 | 1.5 | 3.6 |
| 18:2               | 462.2973 | C23H45NO6P  | 462.2985 | -2.6 | 2.5 | 3.2 |
| 20:1               | 492.3449 | C25H51NO6P  | 492.3454 | -1.0 | 1.5 | 4.2 |
| <b>PS</b>          |          |             |          |      |     |     |
| 32:1               | 732.4843 | C38H71NO10P | 732.4816 | 3.7  | 4.5 | 6.8 |
| 34:1               | 760.5130 | C40H75NO10P | 751.5129 | 0.1  | 4.5 | 8.2 |
| 34:2               | 758.4984 | C40H73NO10P | 758.4972 | 1.6  | 5.5 | 7.1 |
| 36:1               | 788.5428 | C42H79NO10P | 788.5442 | -1.8 | 4.5 | 9.5 |
| 36:2               | 786.5298 | C42H79NO10P | 786.5285 | 1.7  | 5.5 | 8.6 |
| 36:3               | 784.5142 | C42H79NO10P | 784.5129 | 1.7  | 6.5 | 7.7 |
| 38:0               | 818.5909 | C44H85NO10P | 818.5911 | -0.2 | 3.5 | 9.4 |
| 38:1               | 816.5734 | C44H83NO10P | 816.5755 | -2.6 | 4.5 | 8.4 |
| 38:2               | 814.5599 | C44H81NO10P | 814.5598 | 0.1  | 5.5 | 7.4 |
| 38:3               | 812.5459 | C44H79NO10P | 812.5442 | 2.1  | 6.5 | 6.9 |
| 40:5               | 836.5471 | C46H79NO10P | 836.5442 | 3.5  | 8.5 | 7.5 |
| 40:6               | 834.5275 | C46H77NO10P | 834.5285 | -1.2 | 9.5 | 6.5 |

| LPS  |          |            |          |      |     |     |  |
|------|----------|------------|----------|------|-----|-----|--|
| 18:0 | 524.2999 | C24H47NO9P | 524.2988 | 2.1  | 2.5 | 3.0 |  |
| 18:1 | 522.2812 | C24H45NO9P | 522.2832 | -3.8 | 3.5 | 2.5 |  |
| 18:2 | 520.2683 | C24H43NO9P | 520.2675 | 1.4  | 4.5 | 2.1 |  |
| 20:2 | 548.2974 | C26H47NO9P | 548.2988 | -2.6 | 4.5 | 3.2 |  |
| 20:3 | 546.2820 | C26H45NO9P | 546.2832 | -2.2 | 5.5 | 2.6 |  |

| SPHINGOLIPIDS  |              |                    |                       |                      |             |     |          |
|----------------|--------------|--------------------|-----------------------|----------------------|-------------|-----|----------|
| Lipid subclass | Lipid specie | Measured mass (Da) | Elemental composition | Calculated mass (Da) | Error (ppm) | DBE | RT (min) |
| <b>SM</b>      |              |                    |                       |                      |             |     |          |
|                | 14:0         | 675.5458           | C37H76N2O6P           | 675.5436             | 2.5         | 1.5 | 5.9      |
|                | 16:0         | 703.5767           | C39H80N2O6P           | 703.5754             | 1.8         | 1.5 | 7.0      |
|                | 16:1         | 701.5575           | C39H78N2O6P           | 701.5598             | -3.3        | 2.5 | 6.1      |
|                | 18:0         | 731.6085           | C41H84N2O6P           | 731.6067             | 2.5         | 1.5 | 8.5      |
|                | 18:1         | 729.5908           | C41H82N2O6P           | 729.5911             | -0.4        | 2.5 | 7.5      |
|                | 20:0         | 759.6393           | C43H88N2O6P           | 759.6380             | 1.7         | 1.5 | 9.8      |
|                | 20:1         | 757.6228           | C43H86N2O6P           | 757.6224             | 0.9         | 2.5 | 8.6      |
|                | 22:0         | 787.6689           | C45H92N2O6P           | 787.6693             | -0.5        | 1.5 | 11.1     |
|                | 22:1         | 785.6531           | C45H90N2O6P           | 785.6537             | -0.8        | 2.5 | 10.3     |
|                | 24:0         | 815.6987           | C47H96N2O6P           | 815.7006             | -2.7        | 1.5 | 12.3     |
|                | 24:1         | 813.6882           | C47H94N2O6P           | 813.6850             | 3.9         | 2.5 | 11.3     |
|                | 24:2         | 811.6717           | C47H92N2O6P           | 811.6693             | 3.0         | 3.5 | 10.5     |
|                | 24:3         | 809.6568           | C47H90N2O6P           | 809.6577             | -1.1        | 4.5 | 9.6      |
| <b>DHSM</b>    |              |                    |                       |                      |             |     |          |
|                | 14:0         | 677.5593           | C37H78N2O6P           | 677.5598             | -0.7        | 0.5 | 6.3      |
|                | 16:0         | 705.5927           | C39H82N2O6P           | 705.5911             | 2.3         | 0.5 | 7.6      |
|                | 18:0         | 733.6238           | C41H86N2O6P           | 733.6224             | 1.9         | 0.5 | 8.9      |
|                | 20:0         | 759.6514           | C43H90N2O6P           | 759.6537             | -3.0        | 0.5 | 10.2     |
|                | 22:0         | 789.6858           | C45H94N2O6P           | 789.6850             | 1.0         | 0.5 | 11.6     |
|                | 24:0         | 817.7131           | C47H98N2O6P           | 817.7163             | -3.9        | 0.5 | 12.7     |
| <b>Cer</b>     |              |                    |                       |                      |             |     |          |
|                | 14:0         | 510.4876           | C32H64NO3             | 510.4686             | -2.0        | 1.5 | 6.1      |

|               |          |             |          |      |     |      |
|---------------|----------|-------------|----------|------|-----|------|
| 16:0          | 538.5200 | C34H68NO3   | 538.5199 | 0.1  | 1.5 | 7.4  |
| 16:1          | 536.5046 | C34H66NO3   | 536.5043 | 0.3  | 2.5 | 6.4  |
| 18:0          | 566.5512 | C36H72NO3   | 566.5512 | -1.9 | 1.5 | 8.8  |
| 20:0          | 594.5813 | C38H76NO3   | 594.5825 | -2.0 | 1.5 | 10.2 |
| 22:0          | 622.6145 | C40H80NO3   | 622.6138 | 1.1  | 1.5 | 11.6 |
| 22:1          | 620.5985 | C40H78NO3   | 620.5982 | 0.5  | 2.5 | 10.6 |
| 24:0          | 650.6439 | C42H84NO3   | 650.6451 | -1.8 | 1.5 | 12.6 |
| 24:1          | 648.6267 | C42H82NO3   | 648.6295 | -2.8 | 2.5 | 11.6 |
| 24:2          | 646.6117 | C42H80NO3   | 646.6138 | -3.2 | 3.5 | 10.6 |
| <b>DHCer</b>  |          |             |          |      |     |      |
| 16:0          | 540.5330 | C34H708NO3  | 540.5356 | -4.8 | 0.5 | 7.9  |
| 20:0          | 596.5963 | C38H78NO3   | 596.5982 | -3.2 | 0.5 | 10.8 |
| 22:0          | 624.6273 | C40H82NO3   | 624.6295 | -3.5 | 0.5 | 11.9 |
| 24:0          | 652.6605 | C42H86NO3   | 652.6608 | -.3  | 0.5 | 12.9 |
| <b>CMHex</b>  |          |             |          |      |     |      |
| 14:0          | 672.5434 | C38H74NO8   | 672.5414 | 3.0  | 2.5 | 5.5  |
| 16:0          | 700.5748 | C40H78NO8   | 700.5727 | 3.0  | 2.5 | 6.7  |
| 18:0          | 728.6053 | C42H82NO8   | 728.6041 | 1.6  | 2.5 | 8.2  |
| 20:0          | 756.6331 | C44H86NO8   | 756.6353 | -3.0 | 2.5 | 9.4  |
| 22:0          | 784.6685 | C46H90NO8   | 784.6666 | 2.4  | 2.5 | 10.8 |
| 24:0          | 812.6973 | C48H94NO8   | 812.6979 | -0.7 | 2.5 | 12.0 |
| 24:1          | 810.6816 | C48H92NO8   | 810.6823 | -0.9 | 3.5 | 10.9 |
| <b>LacCer</b> |          |             |          |      |     |      |
| 16:0          | 862.6269 | C46H88NO13  | 862.6256 | 1.5  | 3.5 | 6.4  |
| 20:0          | 918.6841 | C50H96NO13  | 918.6882 | -4.5 | 3.5 | 9.1  |
| 22:0          | 946.7161 | C52H100NO13 | 946.7195 | -3.6 | 3.5 | 10.5 |
| 24:0          | 974.7508 | C54H104NO13 | 974.7508 | 0.0  | 3.5 | 11.7 |
| 24:1          | 972.7343 | C54H102NO13 | 972.7351 | -0.8 | 4.5 | 10.9 |



**Supplementary Table 2:** Mean PL content of exosomes represented as pmol equiv / mg protein. Plasmalogen species are highlighted in red.

| Lipid class  | <i>H. polygyrus</i><br>exosomes |                  | MODE-K<br>exosomes |                   | Raw 264.7<br>exosomes |                  |                  |
|--------------|---------------------------------|------------------|--------------------|-------------------|-----------------------|------------------|------------------|
|              | PC                              | Mean (n=3)       | SD                 | Mean (n=3)        | SD                    | Mean (n=2)       | SD               |
| 32:0         |                                 | 85.160           | 5.333              | 10864.909         | 3028.756              | 8913.982         | 2102.205         |
| 32:1         |                                 | 19.715           | 2.510              | 9264.558          | 4174.852              | 5773.526         | 1817.685         |
| 32:2         |                                 | 12.764           | 5.216              | 1113.280          | 557.061               | 378.800          | 89.389           |
| 34:0         |                                 | 129.463          | 18.879             | 4856.966          | 214.256               | 2835.188         | 706.834          |
| 34:1         |                                 | 720.709          | 55.947             | 31970.989         | 5722.009              | 17882.853        | 3551.042         |
| 34:2         |                                 | 860.009          | 76.153             | 7246.623          | 2184.188              | 4200.974         | 1200.492         |
| 34:3         |                                 | 56.881           | 10.600             | 630.224           | 20.981                | 357.719          | 93.352           |
| 36:1         |                                 | 1177.539         | 98.764             | 19419.305         | 719.160               | 17201.469        | 512.661          |
| 36:2         |                                 | 1681.334         | 98.324             | 18102.520         | 1783.302              | 15666.652        | 1905.379         |
| 36:3         |                                 | 1351.189         | 98.492             | 2380.055          | 73.802                | 2124.724         | 15.649           |
| 36:4         |                                 | 577.732          | 54.706             | 570.821           | 201.815               | 566.332          | 108.524          |
| 36:4         |                                 | 393.457          | 41.593             | 248.546           | 76.710                | 294.076          | 32.841           |
| 36:5         |                                 | 35.381           | 16.167             | 469.837           | 150.521               | 409.386          | 149.532          |
| 36:6         |                                 | 21.146           | 10.596             | 123.274           | 26.143                | 121.520          | 33.207           |
| 38:0         |                                 | 0.000            | 0.000              | 199.601           | 29.310                | 135.989          | 40.330           |
| 38:2         |                                 | 569.920          | 36.459             | 2382.324          | 527.061               | 781.106          | 185.484          |
| 38:3         |                                 | 965.802          | 28.747             | 2228.014          | 173.920               | 3175.131         | 992.173          |
| 38:4         |                                 | 485.751          | 56.929             | 0.000             | 0.000                 | 0.000            | 0.000            |
| 38:4         |                                 | 456.036          | 140.703            | 1878.195          | 194.192               | 2867.790         | 1365.719         |
| 38:5         |                                 | 775.753          | 99.182             | 1024.320          | 69.858                | 2432.660         | 634.552          |
| 38:6         |                                 | 636.962          | 89.037             | 392.432           | 137.889               | 1229.251         | 240.254          |
| 40:2         |                                 | 88.561           | 16.278             | 0.000             | 0.000                 | 0.000            | 0.000            |
| 40:5         |                                 | 483.172          | 62.410             | 1137.421          | 372.794               | 3070.998         | 784.594          |
| 40:6         |                                 | 432.267          | 55.325             | 109.077           | 7.379                 | 398.130          | 92.601           |
| 40:6         |                                 | 0.000            | 0.000              | 413.985           | 100.346               | 1739.399         | 416.485          |
| 40:7         |                                 | 217.403          | 21.780             | 106.518           | 44.160                | 319.624          | 116.677          |
| 42:2         |                                 | 39.639           | 5.499              | 0.000             | 0.000                 | 0.000            | 0.000            |
| 44:1         |                                 | 18.997           | 9.767              | 87.054            | 38.825                | 1.662            | 2.350            |
| 44:2         |                                 | 0.000            | 0.000              | 148.733           | 58.945                | 2.493            | 3.525            |
| 44:3         |                                 | 40.807           | 7.774              | 60.477            | 20.866                | 0.831            | 1.175            |
| <b>TOTAL</b> |                                 | <b>12351.081</b> | <b>905.283</b>     | <b>117436.891</b> | <b>18558.607</b>      | <b>92895.646</b> | <b>17040.592</b> |
| Ether-PC     | Mean (n=3)                      | SD               | Mean (n=3)         | SD                | Mean (n=2)            | SD               |                  |
| 30:1         | 5653.276                        | 830.607          | 6.838              | 1.872             | 17.647                | 3.244            |                  |
| 30:2         | 91.267                          | 22.136           | 142.970            | 17.546            | 120.048               | 34.674           |                  |
| 32:1         | 5242.489                        | 1077.872         | 53.976             | 75.561            | 0.000                 | 0.000            |                  |
| 32:2         | 239.248                         | 52.069           | 549.797            | 87.231            | 306.264               | 105.021          |                  |
| 34:0         | 300.973                         | 71.209           | 1419.522           | 139.167           | 1374.215              | 401.839          |                  |
| 34:1         | 380.204                         | 72.056           | 11546.807          | 523.598           | 12320.968             | 3144.831         |                  |
| 34:2         | 145.539                         | 27.206           | 989.663            | 244.257           | 1414.291              | 255.864          |                  |
| 34:3         | 0.000                           | 0.000            | 39.667             | 9.867             | 73.035                | 21.262           |                  |
| 36:0         | 253.880                         | 128.235          | 210.007            | 57.108            | 109.093               | 36.067           |                  |
| <b>36:2</b>  | <b>5407.580</b>                 | <b>909.496</b>   | <b>386.930</b>     | <b>49.169</b>     | <b>188.819</b>        | <b>61.966</b>    |                  |

|                      |                   |                 |                   |                |                   |                 |
|----------------------|-------------------|-----------------|-------------------|----------------|-------------------|-----------------|
| 36:3                 | 214.118           | 15.470          | 295.645           | 34.700         | 884.184           | 234.758         |
| 36:4                 | 452.222           | 17.804          | 269.309           | 34.324         | 712.314           | 160.573         |
| 36:5                 | 14.574            | 12.806          | 112.788           | 41.768         | 381.005           | 123.870         |
| 38:0                 | 50.968            | 88.280          | 65.737            | 1.349          | 17.602            | 8.006           |
| 38:1                 | 2998.374          | 1607.318        | 764.551           | 112.019        | 928.345           | 555.350         |
| 38:2                 | 1739.444          | 220.252         | 1115.796          | 187.572        | 1180.999          | 360.192         |
| 38:3                 | 1536.804          | 155.932         | 142.093           | 12.316         | 180.422           | 59.742          |
| 40:2                 | 27.444            | 47.534          | 310.454           | 81.815         | 132.622           | 40.392          |
| 40:3                 | 0.000             | 0.000           | 53.691            | 9.873          | 41.176            | 7.568           |
| 40:4                 | 0.000             | 0.000           | 18.073            | 3.192          | 51.123            | 24.049          |
| <b>TOTAL</b>         | <b>24748.402</b>  | <b>4836.905</b> | <b>18494.315</b>  | <b>665.226</b> | <b>20434.170</b>  | <b>5639.268</b> |
| <b>Lyso PC</b>       | <b>Mean (n=3)</b> | <b>SD</b>       | <b>Mean (n=3)</b> | <b>SD</b>      | <b>Mean (n=2)</b> | <b>SD</b>       |
| 16:0                 | 165.32            | 38.99           | 1530.89           | 364.29         | 1695.03           | 331.61          |
| 16:1                 | 0.00              | 0.00            | 214.71            | 44.86          | 169.24            | 39.45           |
| 18:0                 | 636.45            | 163.71          | 1217.00           | 365.90         | 1799.14           | 395.57          |
| 18:1                 | 591.89            | 194.91          | 975.79            | 362.56         | 867.14            | 235.20          |
| 18:2                 | 335.26            | 166.54          | 120.38            | 73.87          | 101.00            | 34.57           |
| 20:0                 | 140.92            | 6.16            | 43.46             | 18.42          | 23.77             | 8.63            |
| 20:1                 | 149.06            | 35.97           | 37.73             | 1.99           | 38.62             | 12.97           |
| 20:3                 | 34.12             | 16.57           | 76.75             | 19.92          | 142.61            | 51.76           |
| 20:4                 | 619.01            | 121.20          | 126.89            | 62.11          | 94.78             | 24.21           |
| 20:5                 | 47.57             | 32.38           | 0.00              | 0.00           | 11.91             | 8.51            |
| 22:0                 | 96.55             | 19.69           | 18.24             | 11.95          | 23.77             | 8.63            |
| 22:1                 | 25.14             | 15.24           | 18.24             | 11.95          | 2.99              | 4.22            |
| <b>TOTAL</b>         | <b>2841.30</b>    | <b>551.08</b>   | <b>4380.08</b>    | <b>1287.63</b> | <b>4969.98</b>    | <b>1106.91</b>  |
| <b>Ether-Lyso PC</b> | <b>Mean (n=3)</b> | <b>SD</b>       | <b>Mean (n=3)</b> | <b>SD</b>      | <b>Mean (n=2)</b> | <b>SD</b>       |
| 16:0                 | 83.665            | 26.333          | 77.460            | 21.683         | 163.222           | 22.613          |
| 18:0                 | 0.000             | 0.000           | 40.094            | 2.148          | 47.536            | 17.254          |
| 18:1                 | <b>1684.990</b>   | <b>207.222</b>  | <b>28.858</b>     | <b>6.205</b>   | <b>56.455</b>     | <b>21.538</b>   |
| 20:1                 | 336.797           | 103.651         | 10.737            | 9.323          | 23.768            | 8.627           |
| <b>TOTAL</b>         | <b>2105.452</b>   | <b>283.776</b>  | <b>157.149</b>    | <b>18.901</b>  | <b>290.981</b>    | <b>70.033</b>   |
| <b>PE</b>            | <b>Mean (n=3)</b> | <b>SD</b>       | <b>Mean (n=3)</b> | <b>SD</b>      | <b>Mean (n=2)</b> | <b>SD</b>       |
| 32:0                 | 4717.273          | 1276.611        | 101.049           | 22.055         | 0.000             | 0.000           |
| 32:1                 | 53.618            | 46.525          | 1852.596          | 741.642        | 2121.659          | 201.514         |
| 32:2                 | 13.889            | 24.056          | 737.700           | 414.418        | 397.013           | 27.795          |
| 34:0                 | 1871.864          | 429.606         | 63.719            | 58.062         | 31.447            | 44.472          |
| 34:1                 | 1833.115          | 402.219         | 5783.820          | 1138.585       | 3630.438          | 469.274         |
| 34:2                 | 2107.621          | 573.392         | 6599.203          | 2016.012       | 2813.155          | 246.450         |
| 34:3                 | 38.760            | 67.134          | 442.931           | 67.506         | 196.868           | 32.891          |
| 36:0                 | 0.000             | 0.000           | 214.966           | 208.552        | 259.762           | 121.835         |
| 36:1                 | 6836.980          | 2011.164        | 8050.760          | 747.413        | 4628.865          | 702.752         |
| 36:2                 | 11012.566         | 2416.587        | 18396.419         | 2438.166       | 7447.917          | 1252.168        |
| 36:3                 | 3162.916          | 476.833         | 2905.900          | 123.093        | 1813.090          | 59.759          |
| 36:4                 | 698.883           | 183.020         | 277.602           | 77.270         | 310.207           | 94.967          |
| 36:5                 | 0.000             | 0.000           | 199.776           | 173.043        | 280.398           | 3.706           |
| 38:1                 | 1081.291          | 5.305           | 289.921           | 54.456         | 17.361            | 24.552          |
| 38:2                 | 2285.790          | 104.686         | 1277.125          | 123.951        | 395.375           | 18.993          |

|                 |                   |                 |                   |                 |                   |                 |
|-----------------|-------------------|-----------------|-------------------|-----------------|-------------------|-----------------|
| <b>38:3</b>     | 1708.781          | 315.289         | 2505.468          | 367.687         | 1406.250          | 368.285         |
| <b>38:4</b>     | 317.142           | 98.410          | 693.224           | 145.632         | 524.437           | 103.305         |
| <b>38:5</b>     | 123.364           | 110.971         | 3427.831          | 490.398         | 3020.178          | 932.062         |
| <b>38:6</b>     | 0.000             | 0.000           | 558.916           | 229.145         | 433.373           | 123.688         |
| <b>40:0</b>     | 186.984           | 122.781         | 125.447           | 54.796          | 0.000             | 0.000           |
| <b>40:1</b>     | 793.709           | 359.110         | 202.085           | 22.234          | 80.254            | 64.392          |
| <b>40:2</b>     | 0.000             | 0.000           | 254.365           | 196.659         | 118.252           | 78.289          |
| <b>40:3</b>     | 0.000             | 0.000           | 643.293           | 54.138          | 439.269           | 179.278         |
| <b>40:4</b>     | 0.000             | 0.000           | 1716.036          | 78.343          | 1911.360          | 390.521         |
| <b>40:5</b>     | 0.000             | 0.000           | 707.586           | 83.356          | 503.800           | 221.434         |
| <b>TOTAL</b>    | <b>38844.544</b>  | <b>7996.680</b> | <b>58027.739</b>  | <b>8292.414</b> | <b>32780.726</b>  | <b>4472.691</b> |
| <b>Ether-PE</b> | <b>Mean (n=3)</b> | <b>SD</b>       | <b>Mean (n=3)</b> | <b>SD</b>       | <b>Mean (n=2)</b> | <b>SD</b>       |
| <b>32:1</b>     | 831.95            | 120.80          | 90.44             | 156.65          | 459.91            | 61.15           |
| <b>32:2</b>     | 91.40             | 84.50           | 2104.23           | 1703.07         | 1416.08           | 87.55           |
| <b>32:3</b>     | 131.27            | 134.52          | 694.78            | 937.91          | 0.00              | 0.00            |
| <b>34:0</b>     | 266.44            | 86.63           | 0.00              | 0.00            | 0.00              | 0.00            |
| <b>34:1</b>     | 8307.26           | 2312.36         | 202.09            | 22.23           | 263.04            | 28.26           |
| <b>34:2</b>     | 1533.75           | 219.68          | 17852.65          | 2689.04         | 9996.40           | 1517.15         |
| <b>34:3</b>     | 274.35            | 111.66          | 3969.38           | 482.64          | 2247.44           | 379.40          |
| <b>34:4</b>     | 0.00              | 0.00            | 857.72            | 72.18           | 543.44            | 31.96           |
| <b>36:1</b>     | 3942.98           | 1186.23         | 113.69            | 65.74           | 97.62             | 39.84           |
| <b>36:2</b>     | <b>77583.18</b>   | <b>14336.55</b> | <b>8755.79</b>    | <b>664.02</b>   | <b>4282.30</b>    | <b>703.68</b>   |
| <b>36:3</b>     | 28412.41          | 7635.09         | 13670.35          | 1496.69         | 5691.82           | 978.39          |
| <b>36:4</b>     | 1111.43           | 562.14          | 4863.38           | 688.38          | 4039.90           | 557.29          |
| <b>36:5</b>     | 92.38             | 97.22           | 6393.29           | 577.44          | 8730.67           | 905.66          |
| <b>36:6</b>     | 0.00              | 0.00            | 5692.16           | 1030.01         | 9201.06           | 195.96          |
| <b>38:2</b>     | 11984.63          | 3280.25         | 2208.90           | 129.37          | 1099.32           | 179.74          |
| <b>38:3</b>     | 7101.88           | 1600.77         | 2461.81           | 69.05           | 773.39            | 62.54           |
| <b>38:4</b>     | 1735.44           | 174.93          | 4590.64           | 363.29          | 3180.36           | 127.39          |
| <b>38:5</b>     | 2182.89           | 361.30          | 6583.03           | 617.03          | 5444.84           | 451.21          |
| <b>38:6</b>     | 0.00              | 0.00            | 13409.73          | 1475.94         | 22064.33          | 4196.13         |
| <b>38:7</b>     | 0.00              | 0.00            | 6138.11           | 440.23          | 7811.84           | 1226.69         |
| <b>40:2</b>     | 0.00              | 0.00            | 454.41            | 34.14           | 62.89             | 88.94           |
| <b>40:3</b>     | 0.00              | 0.00            | 1037.40           | 202.93          | 491.35            | 105.62          |
| <b>40:4</b>     | 0.00              | 0.00            | 884.41            | 125.51          | 362.29            | 21.31           |
| <b>40:5</b>     | 0.00              | 0.00            | 1163.37           | 419.38          | 590.61            | 98.67           |
| <b>40:6</b>     | 0.00              | 0.00            | 4369.59           | 782.65          | 6036.75           | 1024.25         |
| <b>40:7</b>     | 0.00              | 0.00            | 2977.37           | 166.64          | 4985.26           | 421.10          |
| <b>TOTAL</b>    | <b>145583.64</b>  | <b>31141.43</b> | <b>111538.71</b>  | <b>8312.57</b>  | <b>99872.90</b>   | <b>12587.46</b> |
| <b>Lyso PE</b>  | <b>Mean (n=3)</b> | <b>SD</b>       | <b>Mean (n=3)</b> | <b>SD</b>       | <b>Mean (n=2)</b> | <b>SD</b>       |
| <b>16:0</b>     | 537.627           | 225.045         | 174.469           | 30.224          | 132.338           | 49.458          |
| <b>16:1</b>     | 32.747            | 11.769          | 173.791           | 68.094          | 70.464            | 18.654          |
| <b>18:0</b>     | 827.179           | 67.827          | 206.557           | 40.099          | 167.056           | 9.460           |
| <b>18:1</b>     | 2593.081          | 1141.492        | 1522.342          | 325.476         | 522.949           | 115.882         |
| <b>18:2</b>     | 1107.469          | 484.842         | 114.677           | 18.930          | 92.279            | 33.306          |
| <b>20:0</b>     | 165.011           | 26.947          | 0.000             | 0.000           | 0.000             | 0.000           |
| <b>20:1</b>     | 111.284           | 47.398          | 170.639           | 82.698          | 45.432            | 0.547           |
| <b>20:2</b>     | 21.034            | 8.924           | 130.072           | 47.960          | 24.325            | 2.001           |

|                      |                   |                 |                   |                 |                   |                |
|----------------------|-------------------|-----------------|-------------------|-----------------|-------------------|----------------|
| <b>20:3</b>          | 24.989            | 9.567           | 223.836           | 76.212          | 95.143            | 29.256         |
| <b>20:4</b>          | 120.605           | 55.455          | 377.860           | 160.489         | 313.325           | 102.920        |
| <b>22:2</b>          | 0.000             | 0.000           | 33.193            | 19.818          | 0.000             | 0.000          |
| <b>22:3</b>          | 0.000             | 0.000           | 36.174            | 9.595           | 0.000             | 0.000          |
| <b>22:4</b>          | 0.000             | 0.000           | 67.470            | 36.395          | 39.351            | 1.048          |
| <b>22:5</b>          | 0.000             | 0.000           | 381.757           | 114.838         | 390.932           | 147.875        |
| <b>22:6</b>          | 0.000             | 0.000           | 188.538           | 105.792         | 101.578           | 38.356         |
| <b>TOTAL</b>         | <b>5541.027</b>   | <b>2070.014</b> | <b>3801.375</b>   | <b>1040.914</b> | <b>1995.173</b>   | <b>545.575</b> |
| <b>Ether-Lyso PE</b> | <b>Mean (n=3)</b> | <b>SD</b>       | <b>Mean (n=3)</b> | <b>SD</b>       | <b>Mean (n=2)</b> | <b>SD</b>      |
| <b>16:1</b>          | 172.39            | 29.86           | 214.72            | 120.20          | 353.42            | 46.22          |
| <b>18:1</b>          | <b>8046.63</b>    | <b>289.50</b>   | <b>129.04</b>     | <b>83.43</b>    | <b>143.44</b>     | <b>24.66</b>   |
| <b>18:2</b>          | 83.17             | 27.42           | 119.90            | 74.39           | 143.44            | 24.66          |
| <b>20:1</b>          | 1247.26           | 191.55          | 0.00              | 0.00            | 0.00              | 0.00           |
| <b>TOTAL</b>         | <b>9549.45</b>    | <b>384.79</b>   | <b>463.66</b>     | <b>277.24</b>   | <b>640.29</b>     | <b>95.54</b>   |
| <b>PS</b>            | <b>Mean (n=3)</b> | <b>SD</b>       | <b>Mean (n=3)</b> | <b>SD</b>       | <b>Mean (n=2)</b> | <b>SD</b>      |
| <b>32:1</b>          | 0.00              | 0.00            | 2896.61           | 1172.31         | 6145.83           | 1031.20        |
| <b>34:1</b>          | 1452.72           | 236.85          | 19545.88          | 6280.44         | 24583.33          | 2357.02        |
| <b>34:2</b>          | 1773.30           | 305.88          | 3829.47           | 1587.76         | 5416.67           | 294.63         |
| <b>36:1</b>          | 12043.04          | 1567.34         | 43507.55          | 7524.60         | 44375.00          | 883.88         |
| <b>36:2</b>          | 16815.90          | 2471.03         | 14741.96          | 2727.29         | 20000.00          | 1178.51        |
| <b>36:3</b>          | 2822.72           | 404.04          | 2553.26           | 399.63          | 4375.00           | 883.88         |
| <b>38:0</b>          | 265.32            | 80.93           | 9630.12           | 2444.06         | 9375.00           | 1767.77        |
| <b>38:1</b>          | 1274.21           | 67.56           | 3968.25           | 901.41          | 4479.17           | 147.31         |
| <b>38:2</b>          | 554.01            | 182.42          | 531.15            | 120.49          | 0.00              | 0.00           |
| <b>38:3</b>          | 3726.32           | 113.40          | 4049.95           | 1168.57         | 2083.33           | 589.26         |
| <b>40:5</b>          | 0.00              | 0.00            | 5270.77           | 4594.74         | 16770.83          | 2209.71        |
| <b>40:6</b>          | 0.00              | 0.00            | 466.85            | 404.55          | 2291.67           | 0.00           |
| <b>TOTAL</b>         | <b>40727.57</b>   | <b>4972.06</b>  | <b>110991.85</b>  | <b>18014.67</b> | <b>139895.83</b>  | <b>1915.08</b> |
| <b>Lyso PS</b>       | <b>Mean (n=3)</b> | <b>SD</b>       | <b>Mean (n=3)</b> | <b>SD</b>       | <b>Mean (n=2)</b> | <b>SD</b>      |
| <b>18:0</b>          | 3557.17           | 1401.85         | 1606.84           | 1550.45         | 2047.10           | 640.50         |
| <b>18:1</b>          | 2223.46           | 749.54          | 1963.91           | 1026.30         | 1604.55           | 424.56         |
| <b>18:2</b>          | 2515.08           | 548.62          | 0.00              | 0.00            | 0.00              | 0.00           |
| <b>20:2</b>          | 472.24            | 128.05          | 147.20            | 132.36          | 251.04            | 150.06         |
| <b>20:3</b>          | 3506.94           | 818.36          | 2452.52           | 600.76          | 1172.36           | 530.70         |
| <b>TOTAL</b>         | <b>12274.88</b>   | <b>3535.53</b>  | <b>6170.47</b>    | <b>2042.86</b>  | <b>5075.05</b>    | <b>1745.81</b> |
|                      |                   |                 |                   |                 |                   |                |
